# Supplementary material for: IFIT1 is rapidly evolving and exhibits disparate antiviral activities across 11 mammalian orders
Source: eLife journal article supplement (doi:10.7554/elife.101929), 2024-10-08
Supplement: fig2-data1 [file Figure2-SourceData-1.pdf › Figure2-SourceData-1.pdf]

**IFIT1**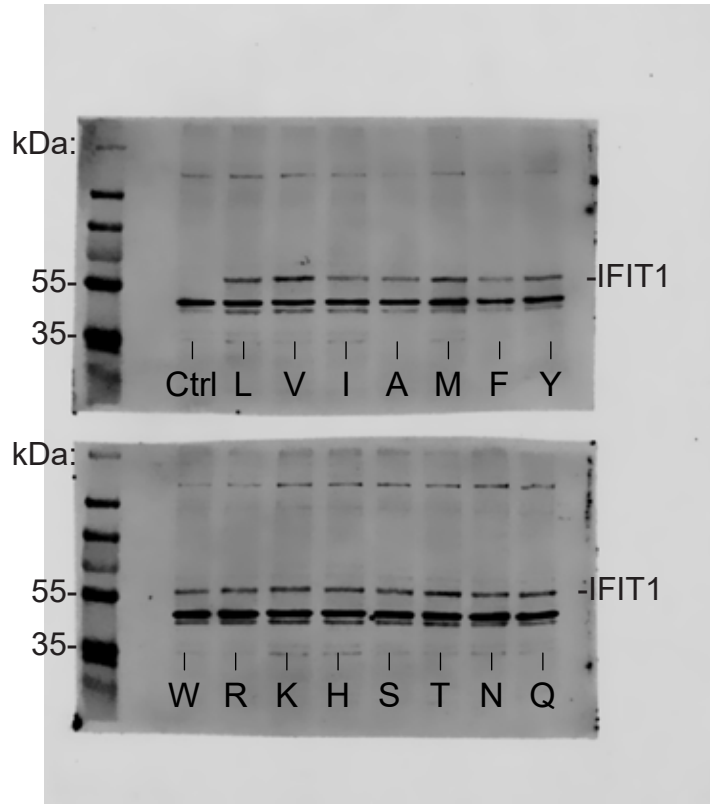**IFIT1**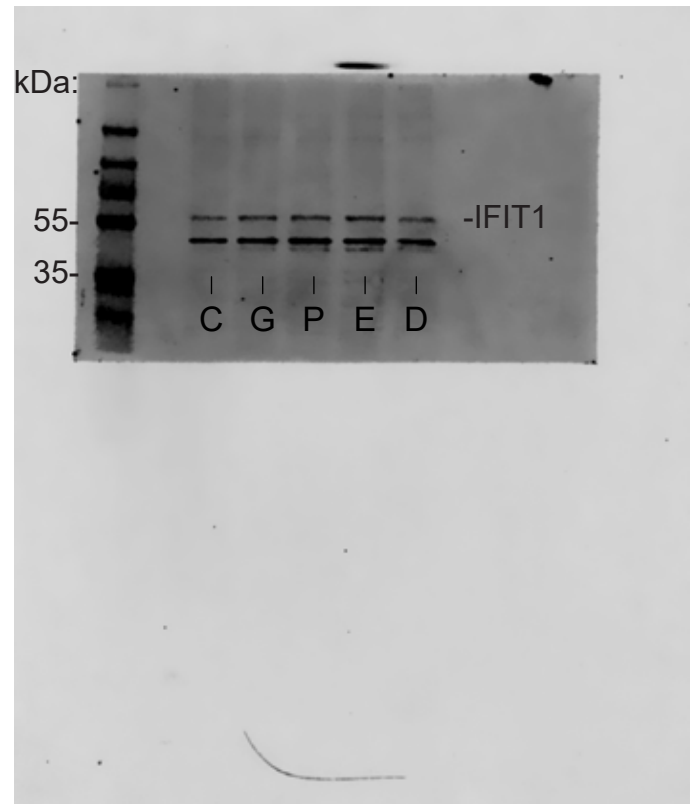**GAPDH**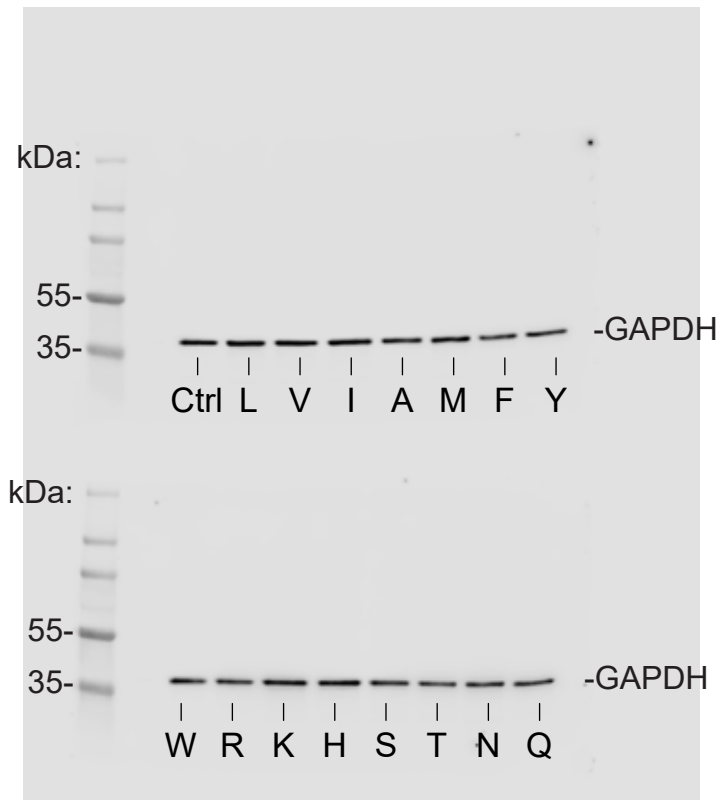**GAPDH**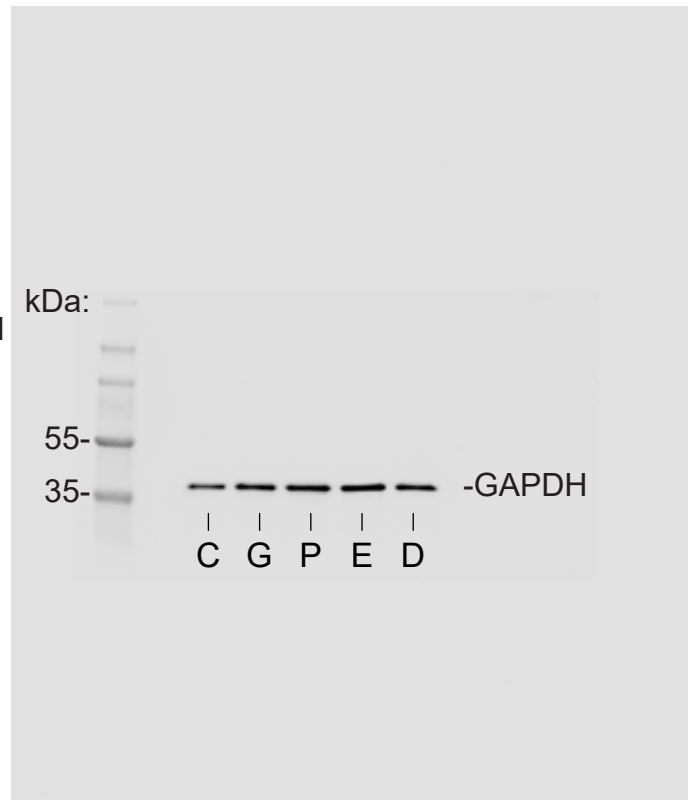

**Figure 2- Source Data 1.** Original images of membranes corresponding to Figure 2, panel D. Molecular weight was determined by PageRuler Plus Prestained Protein Ladder (Thermo Scientific).
