# Supplementary material for: IFIT1 is rapidly evolving and exhibits disparate antiviral activities across 11 mammalian orders
Source: eLife journal article supplement (doi:10.7554/elife.101929), 2024-10-08
Supplement: fig3-figsupp1-data1 [file Figure3-FigureSupplement1-SourceData-1.pdf › Figure3-FigureSupplement1-SourceData-1.pdf]

### HA-tag (IFIT1)

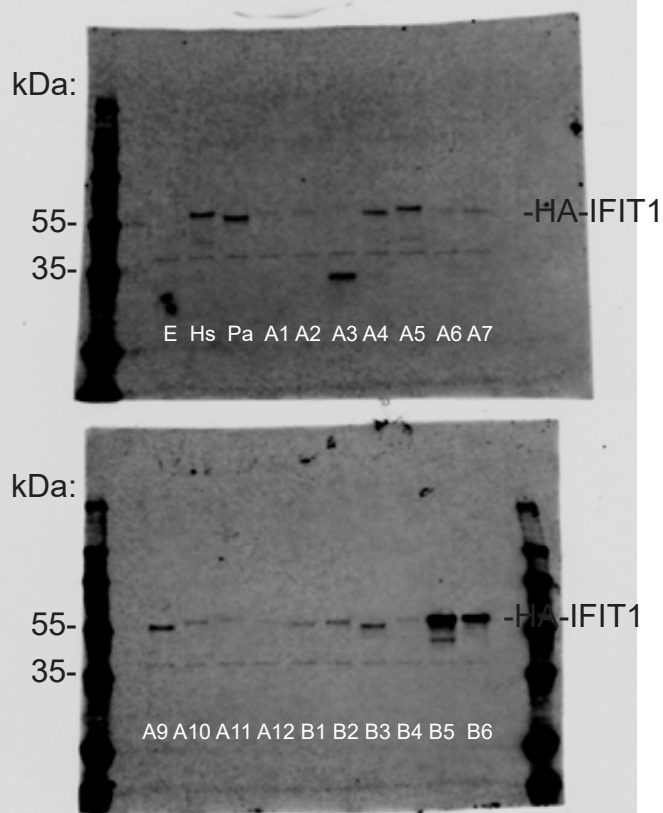

### HA-tag (IFIT1)

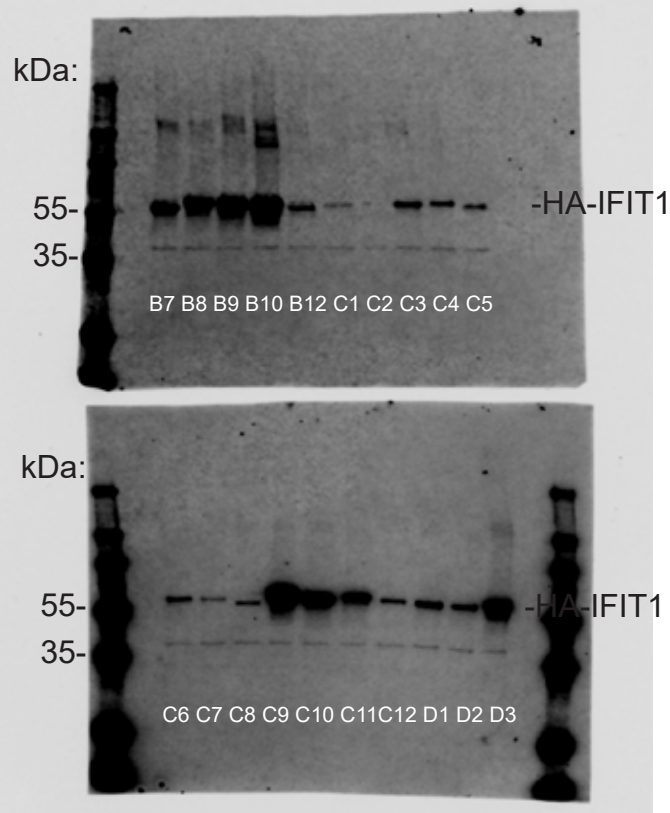

### GAPDH

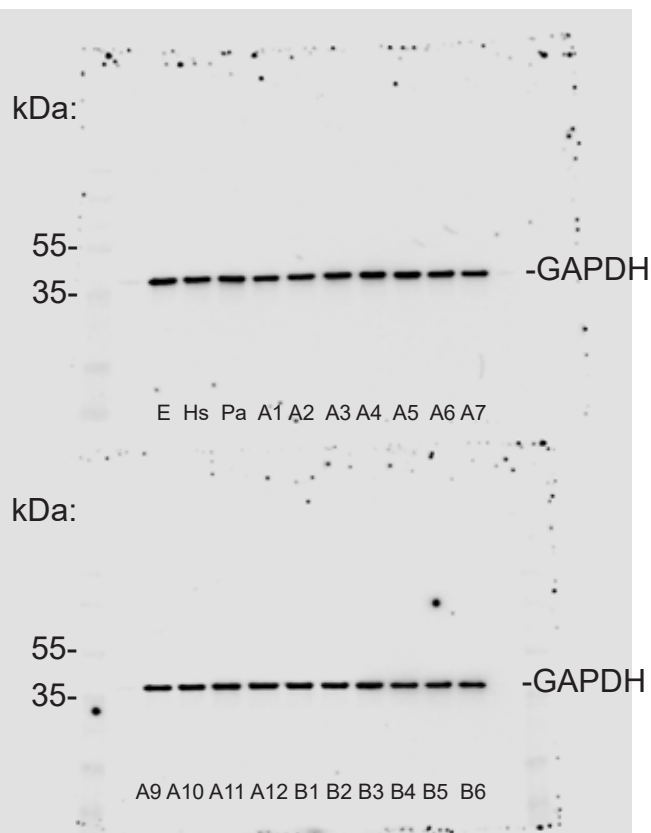

### GAPDH

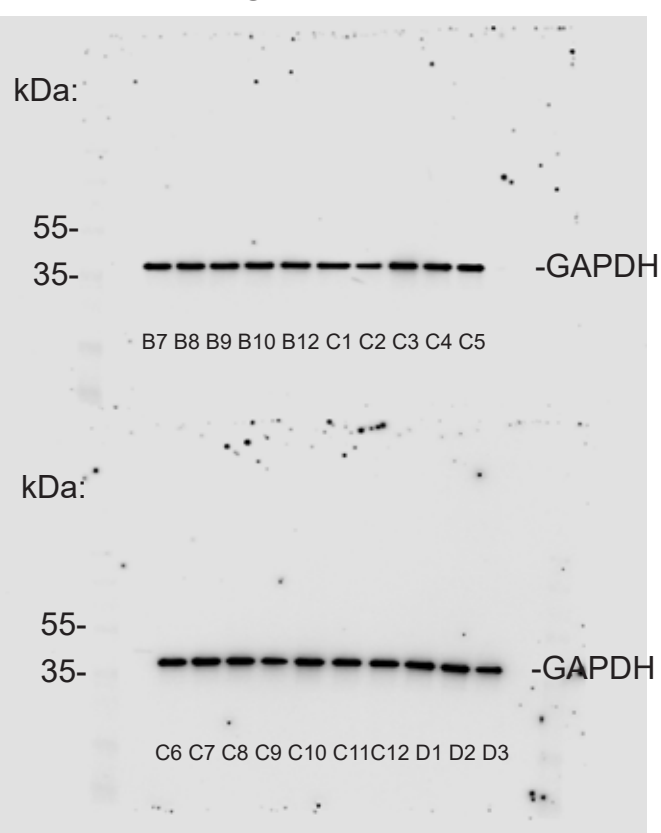

**Figure 3-Figure Supplement1-Source Data 1.** Original images of membranes corresponding to Figure3-Figure Supplement 1, panel A.

Molecular weight was determined by PageRuler Plus Prestained Protein Ladder (Thermo Scientific).
