# Supplementary material for: IFIT1 is rapidly evolving and exhibits disparate antiviral activities across 11 mammalian orders
Source: eLife journal article supplement (doi:10.7554/elife.101929), 2024-10-08
Supplement: fig4-data1 [file Figure4-SourceData-1.pdf › Figure4-SourceData-1.pdf]

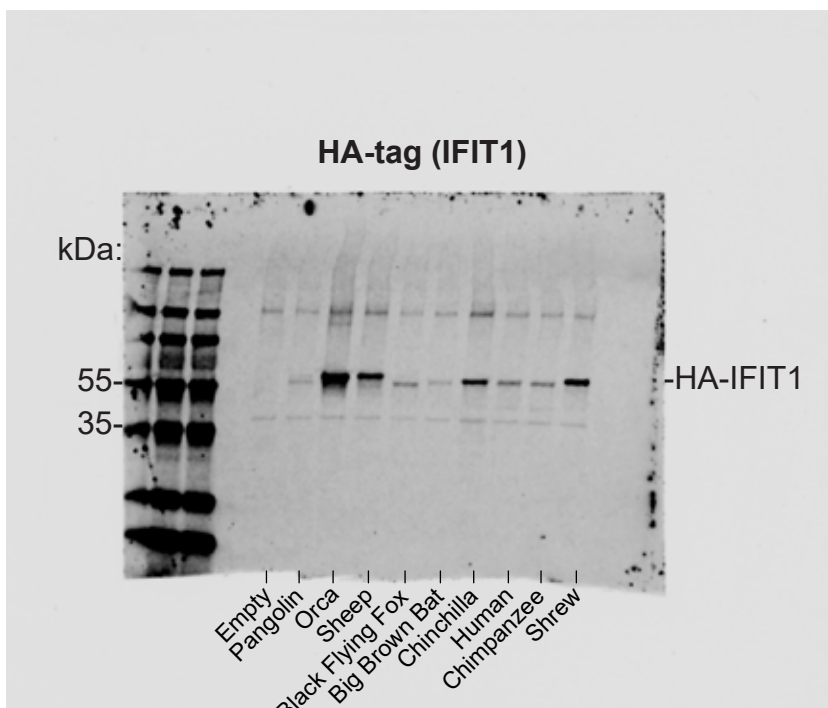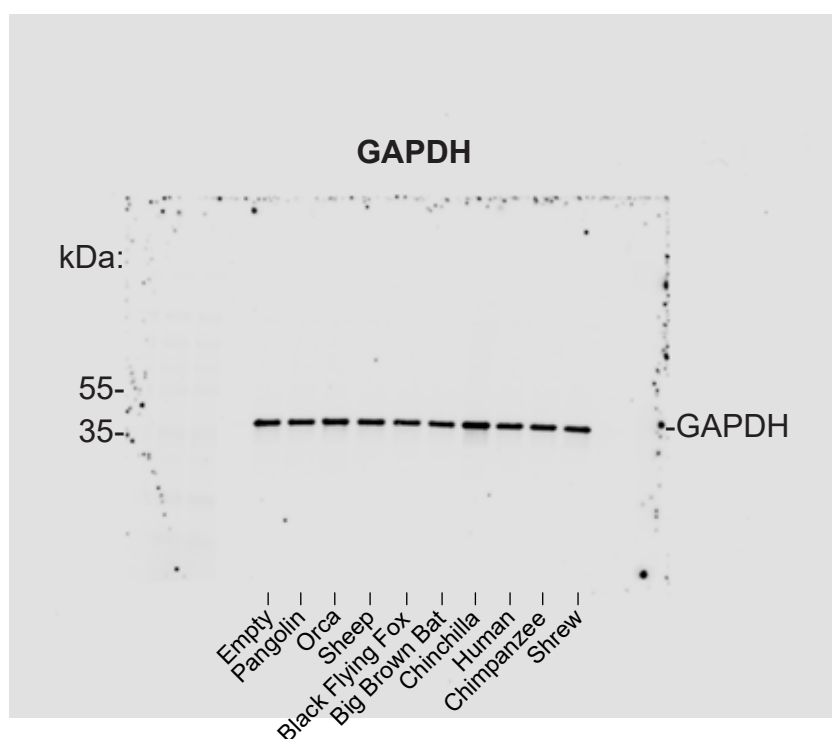

**Figure 4- Source Data 1.** Original images of membranes corresponding to Figure 4, panel B. Molecular weight was determined by PageRuler Plus Prestained Protein Ladder (Thermo Scientific).
