# Supplementary material for: IFIT1 is rapidly evolving and exhibits disparate antiviral activities across 11 mammalian orders
Source: eLife journal article supplement (doi:10.7554/elife.101929), 2024-10-08
Supplement: fig5-data1 [file Figure5-SourceData-1.pdf › Figure5-SourceData-1.pdf]

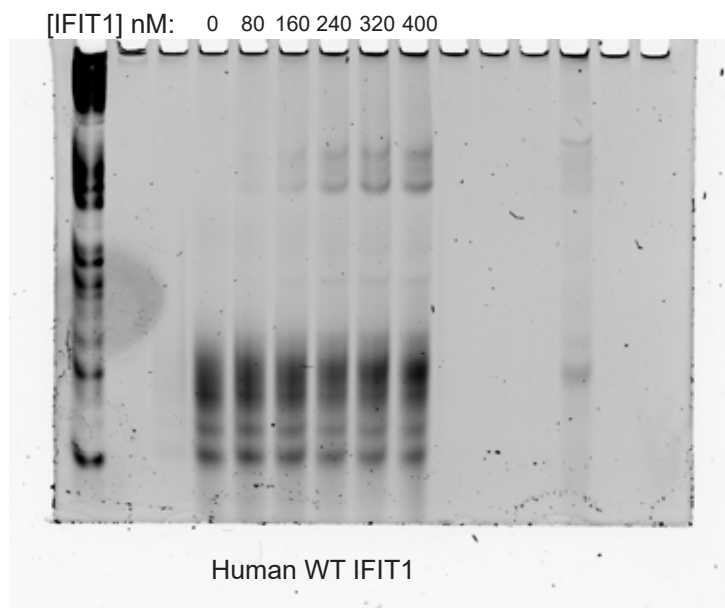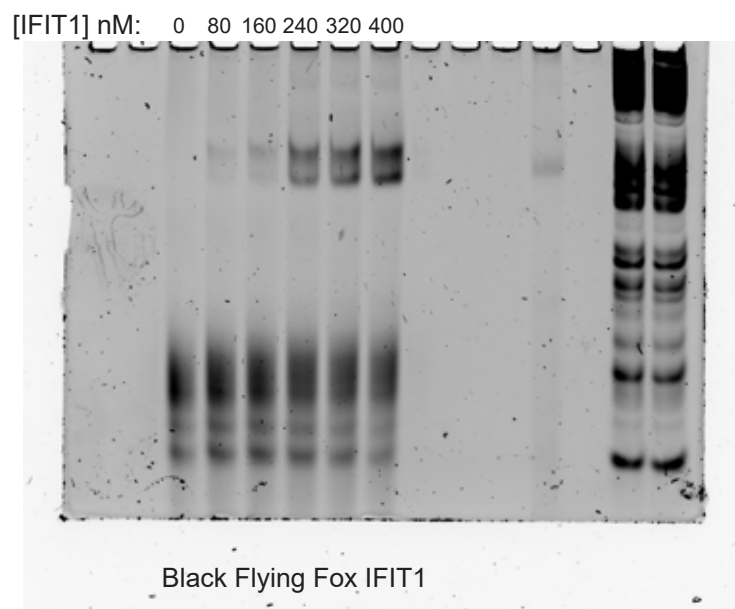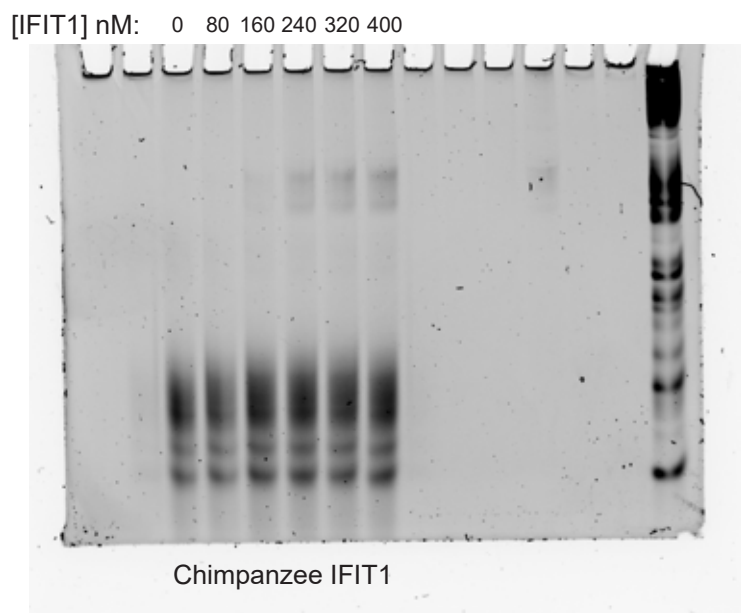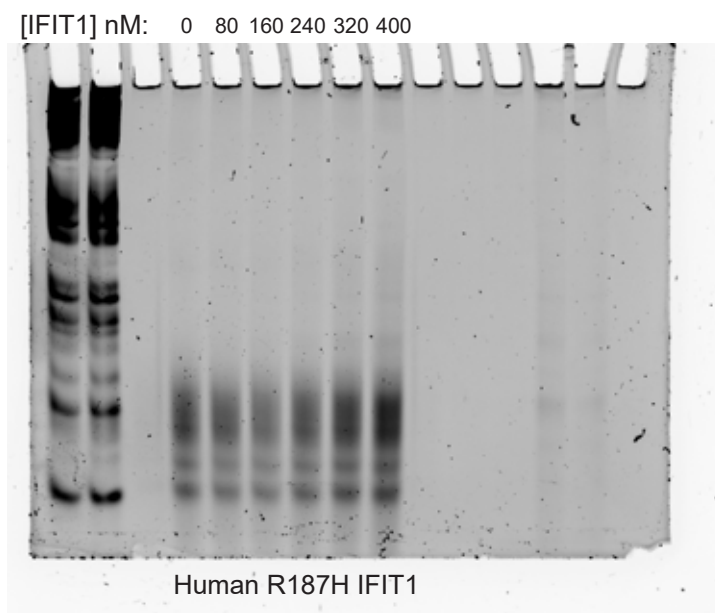

**Figure 5- Source Data 1.** Original images of SYBR Gold stained native gels corresponding to Figure 5, panel A.
