# Supplementary material for: IFIT1 is rapidly evolving and exhibits disparate antiviral activities across 11 mammalian orders
Source: eLife journal article supplement (doi:10.7554/elife.101929), 2024-10-08
Supplement: fig5-figsupp1-data1 [file Figure5-FigureSupplement1-SourceData-1.pdf › Figure5-FigureSupplement1-SourceData-1.pdf]

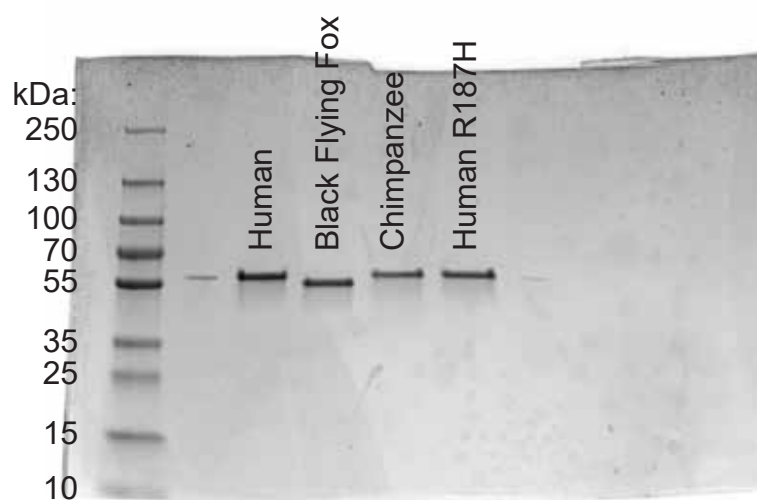

**Figure 5-Figure Supplement 1-Source Data 1.** Original image of Coomassie stained SDS-PAGE gel corresponding to Figure 5-Figure Supplement 1. Molecular weight was determined by PageRuler Plus Prestained Protein Ladder (Thermo Scientific).
