# Supplementary material for: IFIT1 is rapidly evolving and exhibits disparate antiviral activities across 11 mammalian orders
Source: eLife journal article supplement (doi:10.7554/elife.101929), 2024-10-08
Supplement: fig6-data1 [file Figure6-SourceData-1.pdf › Figure6-SourceData-1.pdf]

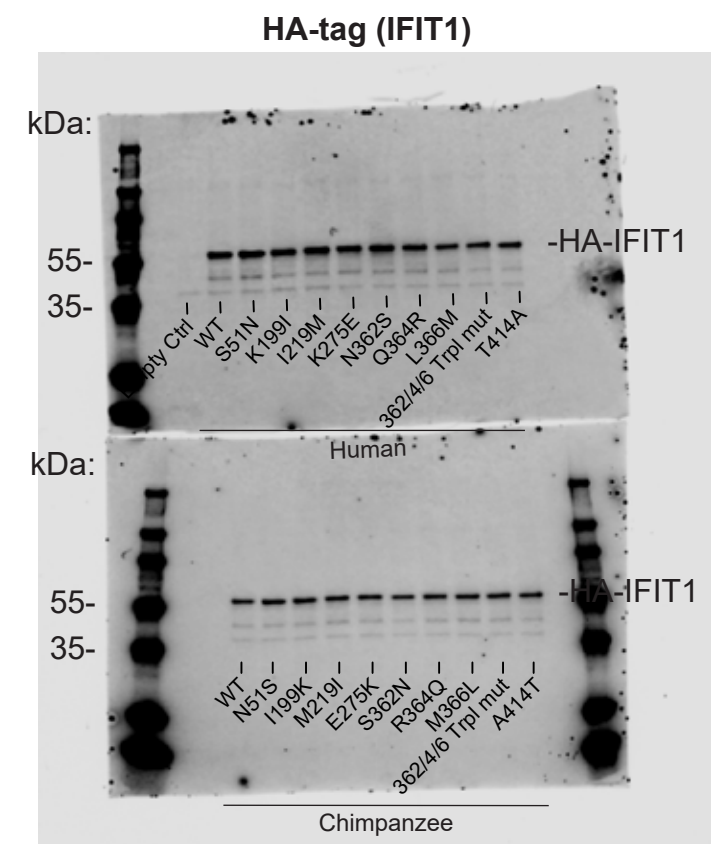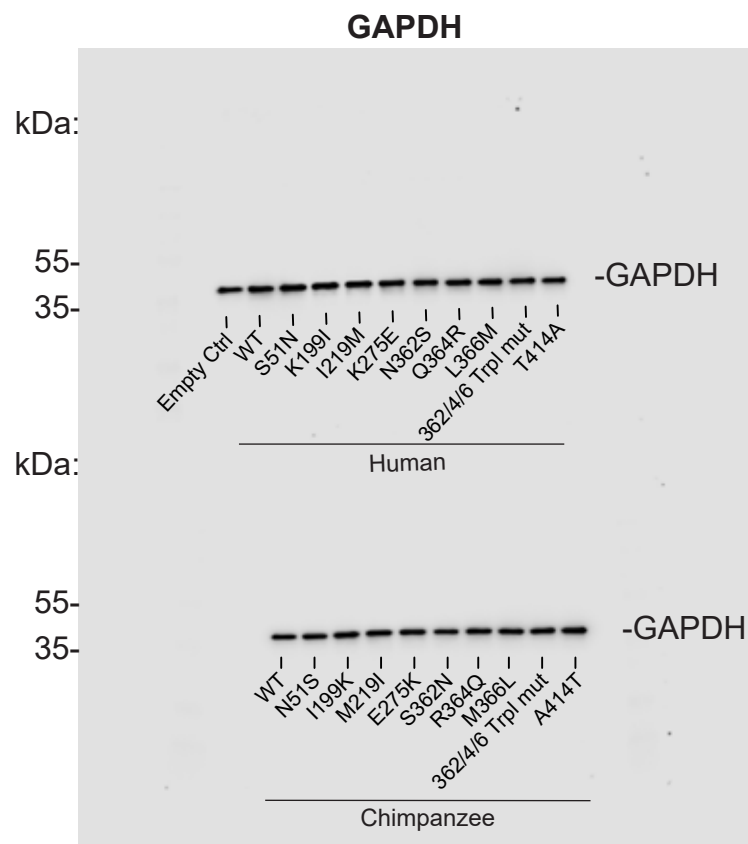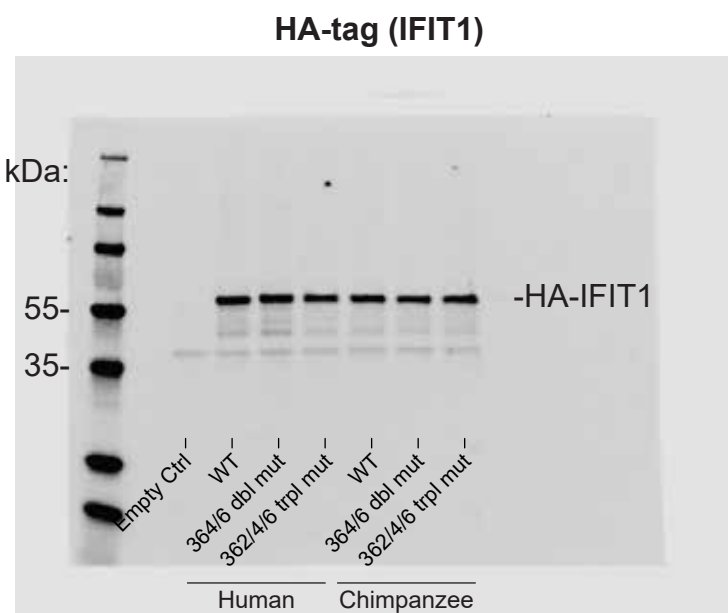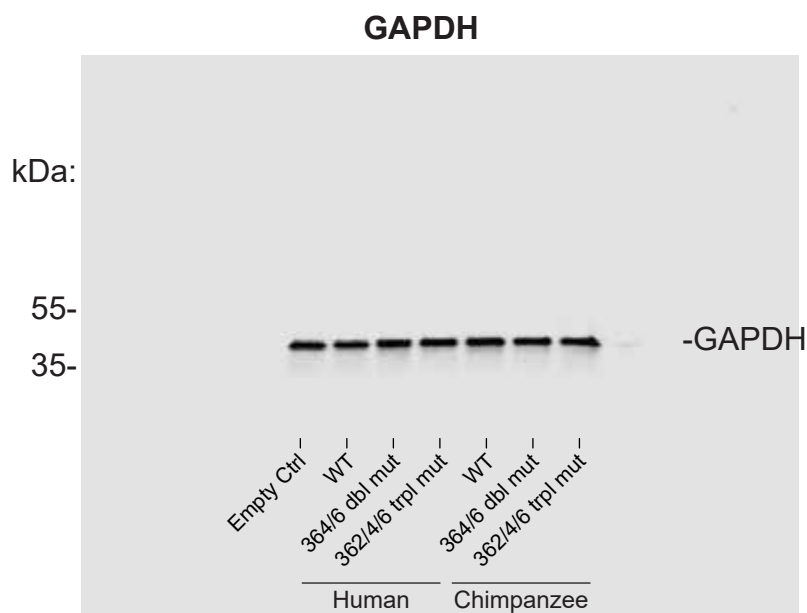

**Figure 6- Source Data 1.** Original images of membranes corresponding to Figure 6, panel B (top), and Figure 6, panel D (bottom). Molecular weight was determined by PageRuler Plus Prestained Protein Ladder (Thermo Scientific).
