# Supplementary material for: IFIT1 is rapidly evolving and exhibits disparate antiviral activities across 11 mammalian orders
Source: eLife. 2025 Oct 22;13:RP101929. doi: 10.7554/eLife.101929 (PMC12543323; doi:10.7554/eLife.101929)
Supplement: Supplementary file 1. [file elife-101929-supp1.xlsx]

## Sheet: 14split2
Supplementary Table 1. Mammalian IFIT1 ortholog characteristics and antiviral activity
						Antiviral activity (% of control)
Common name	Species	Order	Superorder	% identity to human	VEEV rep1	VEEV rep2	VSV rep1	VSV rep2	VSV rep3	NCBI sequence (CDS)
Human	Homo sapiens	Primate	Euarchontoglires	100	8.67089	37.3228	60.7143	75.3425	82.5726	NM_001548.5
African green monkey	Chlorocebus sabaeus	Primate	Euarchontoglires	89.5	50.9494	28.5039	67.5325	79.4521	73.029	XM_007963500.2
Coquerel's sifaka	Propithecus coquereli	Primate	Euarchontoglires	79.1	110.127	53.1496	73.7013	81.6438	74.8963	XM_012659752.1
Black-capped squirrel monkey	Saimiri boliviensis	Primate	Euarchontoglires	88.7	281.646	79.9213	94.8052	88.4932	78.6307	XM 003922412.2
Angola colobus	Colobus angolensis	Primate	Euarchontoglires	91	26.4557	9.33071	69.1558	74.5205	66.5975	XM_011947865.1
Chimpanzee	Pan troglodytes	Primate	Euarchontoglires	98.3	187.975	52.3622	59.7403	79.726	79.0456	NM_001205347.1
Crab-eating macaque	Macaca fascicularis	Primate	Euarchontoglires	89.7	134.177	19.8031	86.3636	87.1233	86.0996	XM 015455916.1
Rhesus macaque	Macaca mulatta	Primate	Euarchontoglires	91.4	93.6709	54.3307	75	83.5616	71.9917	XM_015147649.2
Black flying fox	Pteropus alecto	Chiroptera	Laurasiatheria	69.1	4.94304	13.8976	106.169	99.1781	99.7925	XM_006925964.3
Large flying fox	Pteropus vampyrus	Chiroptera	Laurasiatheria	69.2	24.3038	32.4803	71.4286	88.4932	69.5021	XM_011361637.2
Velvety free tailed bat	Molossus molossus	Chiroptera	Laurasiatheria	65.1	91.1392	40.9449	93.8312	87.1233	82.7801	XM_036265954.1
Greater horseshoe bat	Rhinolophus ferrumequinum	Chiroptera	Laurasiatheria	69.1	299.367	115.748	87.013	79.726	79.8755	XM_033131324.1
Pale spear-nosed bat	Phyllostomus discolor	Chiroptera	Laurasiatheria	65.3	224.684	103.937	82.1429	87.9452	97.7178	XM_028512707.2
Big brown bat	Eptesicus fuscus	Chiroptera	Laurasiatheria	68.5	22.7215	22.1654	75	89.863	96.2656	XM_008156938.2
Kuhl's pipistrelle	Pipistrellus kuhlii	Chiroptera	Laurasiatheria	66.4	130.38	68.5039	86.6883	99.726	73.2365	XM_036438510.1
Natal long-fingered bat	Miniopterus natalensis	Chiroptera	Laurasiatheria	67.6	71.519	51.5748	67.8571	80.274	70.1245	XM_016220858.1
Horse 1	Equus caballus	Perissodactyla	Laurasiatheria	68.3	306.329	124.016	79.5455	83.5616	78.2158	XM_005602371.3
Horse 2	Equus caballus	Perissodactyla	Laurasiatheria	68.8	67.7215	85.4331	101.948	107.945	96.2656	XM_023642993.1
Pig	Sus scrofa	Artiodactyla	Laurasiatheria	66.6	131.646	49.6063	34.0909	44.3836	48.9627	NM_001244363.1
Dromedary camel	Camelus dromedarius	Artiodactyla	Laurasiatheria	65.8	11.6456	10.7087	58.1169	71.2329	90.8714	XM_010996286.2
Cow	Bos taurus	Artiodactyla	Laurasiatheria	65.9	63.9241	32.3622	20.6818	42.4658	58.2988	XM_024986120.1
Sheep	Ovis aries	Artiodactyla	Laurasiatheria	64.2	2.67721	6.9685	65.2597	79.4521	57.0539	XM_004020283.4
White-tailed deer	Odocoileus virginianus texanus	Artiodactyla	Laurasiatheria	68.6	3.46835	9.33071	28.9935	57.8082	45.4357	XM_020894471.1
Killer whale (Orca)	Orcinus orca	Artiodactyla	Laurasiatheria	66.5	5.4557	16.9291	1.18182	2.52055	2.28216	XM_012536578.2
Common bottlenose dolphin	Tursiops truncatus	Artiodactyla	Laurasiatheria	66.9	98.7342	66.1417	2.94156	8.93151	6.05809	XM_019941810.2
Ferret	Mustela putorius furo	Carnivora	Laurasiatheria	67.9	26.4557	54.3307	74.026	75.3425	90.0415	XM_004780758.2
Cat	Felis catus	Carnivora	Laurasiatheria	69	70.2532	72.4409	84.4156	71.5068	96.888	XM_003993875.5
Dog	Canis lupus familiaris	Carnivora	Laurasiatheria	68.4	77.2152	54.7244	39.6104	56.4384	61.2033	XM_843271.5
Grizzly bear	Ursus arctos horribilis	Carnivora	Laurasiatheria	69.2	115.823	53.5433	72.7273	79.1781	80.2905	XM 026504073.1
Harbor (common) seal	Phoca vitulina	Carnivora	Laurasiatheria	68	97.4684	30.1575	73.0519	78.0822	72.4066	XM 032430411.1
California sea lion	Zalophus californianus	Carnivora	Laurasiatheria	68.8	170.886	49.2126	87.3377	83.8356	86.0996	XM 035724333.1
Chinchilla	Chinchilla lanigera	Rodentia	Euarchontoglires	63.7	163.924	83.8583	88.961	81.9178	85.0622	XM_005385850.2
Ord's kangaroo rat	Dipodomys ordii	Rodentia	Euarchontoglires	63.7	231.013	75.9843	56.1688	64.1096	79.4606	XM_013017244.1
Nine-banded armadillo	Dasypus novemcinctus	Cingulata	Xenarthra	71.4	155.696	57.0866	7.01299	9.64384	12.4066	XM_004461422.3
Chinese pangolin	Manis pentadactyla	Pholidota	Laurasiatheria	69	4.32911	5.03937	80.1948	70.137	68.0498	XM_036928813.1
European rabbit	Oryctolagus cuniculus	Lagomorphia	Euarchontoglires	61.2	234.81	101.969	2.26623	8.93151	10	XM_008270173.2
African savannah elephant	Loxodonta africana	Proboscidea	Afrotheria	68.1	2.15823	2.88976	34.0909	43.5616	47.0954	XM_023546938.1
Linnaeus's two-toed sloth	Choloepus didactylus	Pilosa	Xenarthra	72.3	34.7468	48.8189	25.1299	44.3836	47.3029	XM_037804440.1
Cape elephant shrew	Elephantulus edwardii	Macroscelidea	Afrotheria	60.7	114.557	84.252	3.24675	3.80822	5.45643	XM_006880403.1
